# Supplementary material for: Microelectrode generator–collector systems for electrolytic titration: theoretical and practical considerations
Source: Royal Society of Chemistry journal article supplement (doi:10.1039/c7an01450c), 2017-01-01
Supplement: c7an01450c2.pdf [file c7an01450c2.pdf]

## 1 Two disc ion detection problem

We consider the problem of an inlaid disc of radius  $a$  subjected to a constant flux of  $H^+$  ions, with no flux boundary conditions on the rest of the plane. The  $H^+$  ions are subject to a reversible reaction with a base  $A^-$  in the bulk solution, with product  $B$ :

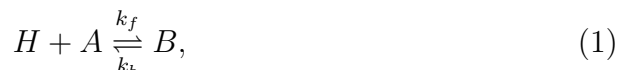

so that the forward and back rate constants are given by  $k_f$  ( $\text{mol}^{-1}\text{m}^3\text{s}^{-1}$ ) and  $k_b$  ( $\text{s}^{-1}$ ) respectively. We would like to know how the concentration varies across the plane. In particular we would like to know what the concentration is on an inlaid detector disc of radius  $b$ , whose centre is a distance  $L$  away from the centre of the first disc.

Ingoing any electric effects and seeking only steady solutions, the governing equations for the concentration of the three species  $H$ ,  $A$  and  $B$ , are

$$D_H \nabla^2 H = k_f HA - k_b B, \quad (2)$$

$$D_A \nabla^2 A = k_f HA - k_b B, \quad (3)$$

$$D_B \nabla^2 B = -k_f HA + k_b B. \quad (4)$$

The boundary conditions for  $H$  are given by

$$D_H \frac{\partial H}{\partial z} = -Q, \quad \text{for } r < a, z = 0, \quad (5)$$

$$\frac{\partial H}{\partial z} = 0, \quad \text{for } r > a, z = 0, \quad (6)$$

$$H(r, z) \rightarrow 0, \quad \text{as } |\mathbf{r}| \rightarrow \infty, \quad (7)$$

Here  $Q$  is the constant flux of ions from the disc, and has the dimensions  $\text{mol m}^{-2} \text{s}^{-1}$ . We shall also assume that the diffusion coefficient is constant, and we assume that the bulk concentration of  $H$  is zero.

The boundary conditions for  $A$  are:

$$\frac{\partial A}{\partial z} = 0, \quad \text{on } z = 0, \quad (8)$$

$$A(r, z) \rightarrow A_\infty, \quad \text{as } |\mathbf{r}| \rightarrow \infty, \quad (9)$$

where  $A_\infty$  is the bulk concentration of the base.

The boundary conditions for  $B$  are:

$$\frac{\partial B}{\partial z} = 0, \quad \text{on } z = 0, \quad (10)$$

$$B(r, z) \rightarrow 0, \quad \text{as } |\mathbf{r}| \rightarrow \infty. \quad (11)$$

The first thing we note is that by adding (3) and (4), and using the boundary conditions for  $A$  and  $B$ , it follows that

$$\nabla^2 (D_A A + D_B B) = 0, \quad (12)$$

subject to the boundary conditions

$$\frac{\partial (D_A A + D_B B)}{\partial z} = 0, \quad \text{on } z = 0, \quad (13)$$

$$D_A A + D_B B \rightarrow D_A A_\infty, \quad \text{as } |\mathbf{r}| \rightarrow \infty. \quad (14)$$

This means that the quantity  $D_A A + D_B B$  is conserved, and

$$D_A A + D_B B = D_A A_\infty. \quad (15)$$

Solving for  $B$  and substituting in, we find that the governing equations reduce to two equations for  $H$  and  $A$ :

$$D_H \nabla^2 H = k_f H A - \frac{k_b D_A}{D_B} (A_\infty - A), \quad (16)$$

$$D_A \nabla^2 A = k_f H A - \frac{k_b D_A}{D_B} (A_\infty - A). \quad (17)$$

To non-dimensionalise, we choose the following scalings:

$$r = a\hat{r}, \quad z = a\hat{z}, \quad H = \frac{Qa}{D_H} \hat{H}, \quad A = A_\infty \hat{A}. \quad (18)$$

On dropping the hats, the equations become

$$\nabla^2 H = k_1 H A - k_2 (1 - A), \quad (19)$$

$$k_3 \nabla^2 A = k_1 H A - k_2 (1 - A), \quad (20)$$

where the non-dimensional parameters  $k_1$ ,  $k_2$  and  $k_3$  are given by

$$k_1 = \frac{k_f a^2 A_\infty}{D_H}, \quad k_2 = \frac{k_b a A_\infty D_A}{Q D_B}, \quad k_3 = \frac{A_\infty D_A}{Q a}. \quad (21)$$

The boundary conditions for  $H$  are

$$\frac{\partial H}{\partial z} = -1, \quad \text{for } r < 1, \quad z = 0, \quad (22)$$

$$\frac{\partial H}{\partial z} = 0, \quad \text{for } r > 1, \quad z = 0, \quad (23)$$

$$H(r, z) \rightarrow 0, \quad \text{as } |\mathbf{r}| \rightarrow \infty, \quad (24)$$

and boundary conditions for  $A$

$$\frac{\partial A}{\partial z} = 0, \quad \text{on } z = 0, \quad (25)$$

$$A(r, z) \rightarrow 1, \quad \text{as } |\mathbf{r}| \rightarrow \infty, \quad (26)$$

Now we note that if we subtract (20) from (19) we find that

$$\nabla^2(H - k_3 A) = 0, \quad (27)$$

with boundary conditions

$$\frac{\partial(H - k_3 A)}{\partial z} = -1, \quad \text{for } r < 1, \quad z = 0, \quad (28)$$

$$\frac{\partial(H - k_3 A)}{\partial z} = 0, \quad \text{for } r > 1, \quad z = 0, \quad (29)$$

$$(H - k_3 A) \rightarrow -k_3, \quad \text{as } |\mathbf{r}| \rightarrow \infty. \quad (30)$$

Using the Hankel transform, it is easy to show that the solution to this problem is given by

$$H(r, z) - k_3 A(r, z) = -k_3 + \int_0^\infty J_0(\alpha r) J_1(\alpha) \exp(-\alpha z) \frac{d\alpha}{\alpha}, \quad (31)$$

where  $J_0$  and  $J_1$  are Bessel functions of order zero and one. The concentration of  $H$  on the plane  $z = 0$  is therefore given by

$$H(r, 0) = \int_0^\infty J_0(\alpha r) J_1(\alpha) \frac{d\alpha}{\alpha} - k_3 (1 - A(r, 0)). \quad (32)$$

This means that the concentration of  $H$  is equal to the concentration for a disk generator with no reaction less the amount that has reacted with  $A$ ,

which is proportional to  $(1-A)$ . It is very important to note that the reaction with  $A$  only makes a noticeable difference to the concentration of  $H$  detected if  $k_3$  is at least  $O(1)$ . This is vital in determining sensor design.

From (31), we may write

$$H(r, z) = k_3 (A(r, z) - 1) + H_1(r, z), \quad (33)$$

where  $H_1$  is the solution for the disc generator with no bulk reaction, which we emphasize is known. Substituting into (20), we find a governing equation for  $A$

$$\nabla^2 A = k_1 (A - 1) A + \frac{k_1}{k_3} A H_1 - \frac{k_2}{k_3} (1 - A), \quad (34)$$

$$= k_1 A^2 + A \left( \frac{k_1}{k_3} H_1 + \frac{k_2}{k_3} - k_1 \right) - \frac{k_2}{k_3}, \quad (35)$$

with boundary conditions (25) and (26). Hence we have reduced three governing equations down to one governing equation for  $A$  with simple boundary conditions. It is still a complicated equation, and is non-linear in  $A$ , but we may be able to do some asymptotics depending on the sizes of the parameters  $k_1$ ,  $k_2$  and  $k_3$ . We shall assume that  $Q$  has been chosen such that  $k_3 = O(1)$ .

We note that in general  $k_f$  and  $k_b$  have the following magnitudes

$$k_f \approx 10^6 - 10^7 \text{ mol}^{-1} \text{ m}^3 \text{ s}^{-1}, \quad (36)$$

$$k_b \approx 10^3 - 10^4 \text{ s}^{-1}. \quad (37)$$

This implies that  $k_1$  will be large, while depending on the value of  $Q$ ,  $k_2$  will be around  $O(1)$ . Dividing through by  $k_1$ , the governing equation becomes:

$$\frac{1}{k_1} \nabla^2 A = A^2 + A \left( \frac{1}{k_3} H_1 + \frac{k_2}{k_1 k_3} - 1 \right) - \frac{k_2}{k_1 k_3}. \quad (38)$$

Provided that we are not near the disc then the lefthand side may be neglected and the solution to the following quadratic satisfies the boundary conditions (25) and (26):

$$A^2 + A \left( \frac{1}{k_3} H_1 + \frac{k_2}{k_1 k_3} - 1 \right) - \frac{k_2}{k_1 k_3} = 0. \quad (39)$$

so that

$$A = \frac{1}{2} \left( - \left( \frac{1}{k_3} H_1 + \frac{k_2}{k_1 k_3} - 1 \right) + \sqrt{\left( \frac{1}{k_3} H_1 + \frac{k_2}{k_1 k_3} - 1 \right)^2 + 4 \frac{k_2}{k_1 k_3}} \right), \quad (40)$$

where we have taken the positive square root to ensure that  $A > 0$ . Inserting this into (33) we obtain

$$H(r, z) = \frac{1}{2} \left( H_1(r, z) - \frac{k_2}{k_1} - k_3 + \sqrt{\left( H_1(r, z) + \frac{k_2}{k_1} - k_3 \right)^2 + 4 \frac{k_2 k_3}{k_1}} \right). \quad (41)$$

In the limit that  $k_2/k_1 \ll 1$ , we have to be a bit more careful. Letting  $k_2/k_1 = \epsilon$ , and expanding the original quadratic in powers of  $\epsilon$ , so that

$$A = A_0 + \epsilon A_1 + \epsilon^2 A_2 + \dots \quad (42)$$

Then the solution is given by

$$A_0 = 1 - \frac{H_1}{k_3}, \quad (43)$$

$$A_1 = \frac{H_1}{k_3(k_3 - H_1)}. \quad (44)$$

## 2 Concentration on disc far away

Suppose that we now would like to measure the concentration on a disc whose centre is a non-dimensional distance  $\lambda$  away from the centre of the generator disc, and let us assume that  $\lambda \gg 1$ . Then it is convenient to write the solution for  $H_1(r, z)$  in the following form:

$$H_1(r, z) = \frac{2}{\pi} \int_0^1 K \left( \frac{2\sqrt{rs}}{(r+s)^2 + z^2} \right) \frac{s ds}{\sqrt{(r+s)^2 + z^2}}, \quad (45)$$

where  $K(\cdot)$  denotes a complete elliptic integral of the first kind. Then the far field behaviour as  $r \rightarrow \infty$  on  $z = 0$  is easily shown to be

$$H_1(r, z) \sim \frac{1}{2r} + O\left(\frac{1}{r^3}\right), \quad (46)$$

so that the disc is a point source as expected. Substituting this into the solution (49), we obtain:

$$H(r, z) \sim \frac{1}{2} \left( \frac{1}{2r} - \frac{k_2}{k_1} - k_3 + \sqrt{\left( \frac{1}{2r} + \frac{k_2}{k_1} - k_3 \right)^2 + 4 \frac{k_2 k_3}{k_1}} \right). \quad (47)$$

Writing  $r$  in terms of a cylindrical coordinate system  $(s, \theta)$  centered at the centre of the detection disc, so that

$$r = \sqrt{\lambda^2 + 2\lambda s \cos \theta + s^2}, \quad (48)$$

and expanding in powers of  $\lambda$ , we obtain:

$$H(s, \theta) \sim \frac{k_2}{2(k_2 + k_1 k_3)\lambda} + \frac{k_2(k_1^2 k_3 - 2(k_2 + k_1 k_3)^2 s \cos \theta)}{4(k_2 + k_1 k_3)^3 \lambda^2} + O\left(\frac{1}{\lambda^3}\right). \quad (49)$$

Hence the average concentration across the detection disc is given by (assuming that the non-dimensional radius is  $b$ ):

$$H_{\text{Av}} = \frac{1}{\pi b^2} \int_0^b \int_0^{2\pi} H(s, \theta) s \, ds \, d\theta, \quad (50)$$

$$= \frac{k_2}{2(k_2 + k_1 k_3)\lambda} + O\left(\frac{1}{\lambda^2}\right). \quad (51)$$

In dimensional terms, we have to leading order

$$H_{\text{Av, dim}} = \frac{Qa}{2 \left( D_H + \frac{k_f}{k_b} A_\infty D_B \right) \lambda} \quad (52)$$
